# Supplementary material
Source: PubMed Central journal article supplement (PMC7187728)
Supplement: NIHMS1576647-supplement-Supplemental_information.pdf [file NIHMS1576647-supplement-Supplemental_information.pdf]

# Supplemental Information for

## Comparison of *Alicyclobacillus acidocaldarius*

## OSBS to its promiscuous NSAR/OSBS relatives

Denis Odokonyero<sup>‡a</sup>, Andrew W. McMillan<sup>‡†a</sup>, Udupi A. Ramagopal<sup>b</sup>, Rafael Toro<sup>†c</sup>, Dat P. Truong<sup>a</sup>, Mingzhao Zhu<sup>f</sup>, Mariana S. Lopez<sup>a</sup>, Belema Somiari<sup>a</sup>, Meghann Herman<sup>a</sup>, Asma Aziz<sup>a</sup>, Jeffrey B. Bonanno<sup>c</sup>, Kenneth G. Hull<sup>f</sup>, Stephen K. Burley<sup>e</sup>, Daniel Romo<sup>f</sup>, Steven C. Almo<sup>c,d</sup>, and Margaret E. Glasner<sup>\*a</sup>

<sup>a</sup>Department of Biochemistry and Biophysics, Texas A&M University, 2128 TAMU, College Station, TX 77843-2128, <sup>b</sup>Poornaprajna Institute, Bangalore India, <sup>c</sup>Department of Biochemistry and <sup>d</sup>Department of Physiology & Biophysics, Albert Einstein College of Medicine, 1300 Morris Park Ave, Bronx, NY 10461, <sup>e</sup>RCSB Protein Data Bank, Institute for Quantitative Biomedicine, Rutgers, The State University of New Jersey, and Rutgers, Cancer Institute of New Jersey, and <sup>f</sup>Department of Chemistry and Biochemistry, CPRIT Synthesis and Drug-Lead Discovery Lab, Baylor University, One Bear Place, Waco, TX 76798-7348.

<sup>‡</sup> D.O. and A.W.M contributed equally.

## Supplemental Materials and methods

*General procedure for synthesis of succinyl amino acids:* A solution of amino acid (1.0 equiv) and succinic anhydride (1.0 equiv) in acetic acid (~1 mmol/mL) was heated at 50 °C under N<sub>2</sub> for 5 h. After concentration in vacuo to remove acetic acid, the crude product was purified by flash chromatography using gradient elution (CH<sub>2</sub>Cl<sub>2</sub>:MeOH from 20:1 to 15:1) with 60 Å silica gel (230-400 mesh) as stationary phase to provide the desired succinylated product. Purity was confirmed by HPLC analysis performed with a Gemini HPLC column (C18, 3 micron, 150 x 4.60 mm). Mobile phase A: 0.2% H<sub>3</sub>PO<sub>4</sub> in H<sub>2</sub>O; mobile phase B: 0.2% H<sub>3</sub>PO<sub>4</sub> in CH<sub>3</sub>CN/H<sub>2</sub>O (4:1).

*N-Succinyl-L-phenylalanine:* Following the general procedure, *L*-phenylalanine (1.20 g, 7.26 mmol) and succinic anhydride (730 mg, 7.26 mmol) afforded *N*-succinyl-*L*-phenylalanine as colorless crystals (1.58 g, 82%). Characterization data matched that previously reported.<sup>1</sup>

*N-Succinyl-D-phenylalanine:* Following the general procedure, *D*-phenylalanine (1.20 g, 7.26 mmol) and succinic anhydride (730 mg, 7.26 mmol) afforded *N*-succinyl-*D*-phenylalanine as colorless crystals (1.45 g, 75%). Characterization data matched that previously reported.<sup>1</sup>

*N-Succinyl-L-valine:* Following the general procedure, *L*-valine (937 mg, 8.00 mmol) and succinic anhydride (801 mg, 8.00 mmol) afforded *N*-succinyl-*L*-valine as colorless crystals (1.49 g, 86%). Characterization data matched that previously reported.<sup>1</sup>

*N-Succinyl-L-methionine:* Following the general procedure, *L*-methionine (1.19 g, 8.00 mmol) and succinic anhydride (801 mg, 8.00 mmol) afforded *N*-succinyl-*L*-methionine as a colorless oil (1.45 g, 73%). Characterization data matched that previously reported.<sup>1</sup>

*N-Succinyl-L-tryptophan*: Following the general procedure, *L*-tryptophan (1.02 g, 5.00 mmol) and succinic anhydride (501 mg, 5.00 mmol) afforded *N*-succinyl-*L*-tryptophan as a colorless oil (1.22 g, 80%). Characterization data matched that previously reported.<sup>1</sup>

Specific rotation of each substrate was determined by fitting three independent serial dilutions to a straight line. Specific rotations of each substrate at 405 nm are: 6.54 deg M<sup>-1</sup> cm<sup>-1</sup> (*L*- and *D*-NSPG)<sup>2</sup>, 2.2 deg M<sup>-1</sup> cm<sup>-1</sup> (*N*-succinyl-*L*- and *D*- phenylalanine), 0.9 deg M<sup>-1</sup> cm<sup>-1</sup> (*N*-succinyl-*L*-valine), 1.0 deg M<sup>-1</sup> cm<sup>-1</sup> (*N*-succinyl-*L*-methionine), and 1.9 deg M<sup>-1</sup> cm<sup>-1</sup> (*N*-succinyl-*L*-tryptophan).

## References

(1) Sakai, A., Xiang, D. F., Xu, C., Song, L., Yew, W. S., Raushel, F. M., and Gerlt, J. A. (2006) Evolution of enzymatic activities in the enolase superfamily: *N*-succinylamino acid racemase and a new pathway for the irreversible conversion of *D*- to *L*-Amino Acids, *Biochemistry* 45, 4455-4462.

(2) McMillan, A. W., Lopez, M. S., Zhu, M., Morse, B. C., Yeo, I. C., Amos, J., Hull, K., Romo, D., and Glasner, M. E. (2014) Role of an active site loop in the promiscuous activities of *Amycolatopsis* sp. T-1-60 NSAR/OSBS, *Biochemistry* 53, 4434-4444.

**Table S1.** Primers used for cloning NSAR/OSBS subfamily genes.

| <b>Species</b>                                                                                                  | <b>Primer sequence</b>                                                                                                                           |
|-----------------------------------------------------------------------------------------------------------------|--------------------------------------------------------------------------------------------------------------------------------------------------|
| AmedNSAR/OSBS                                                                                                   | FORWARD:<br><u>TACTTCCAATCCAATGCC</u> ATGAAACTCACCGGGGTGGA ACTCC<br><br>REVERSE:<br><u>TTATCCACTTCCAATGTTA</u> CTAGGCGAGCCAGGACTTCGCGG           |
| LvNSAR/OSBS                                                                                                     | FORWARD:<br><u>TACTTCCAATCCAATGCC</u> ATGAAAGTAGAAAAGATTACTTTAAGAC<br><br>REVERSE:<br><u>TTATCCACTTCCAATGTTA</u> TTATTGATAGACCTCTTTGCTTATTGTCAGC |
| RcNSAR/OSBS                                                                                                     | FORWARD:<br><u>TACTTCCAATCCAATGCC</u> ATGAAGATCGAGTCGATCACATTG<br><br>REVERSE:<br><u>TTATCCACTTCCAATGTTA</u> TCATCCTTTCCAATGATCACCTCACG          |
| All DNA primers are shown in the 5' to 3' direction. The red, underlined bases are part of the vector sequence. |                                                                                                                                                  |

**Table S2.** Primers used for mutagenesis.

| <b>Mutation</b> | <b>Template</b> | <b>Primer sequence</b>                                                         |
|-----------------|-----------------|--------------------------------------------------------------------------------|
| M18F            | AaOSBS WT       | Forward: GAAATTTCCG <u>ttc</u> CGTACGGCGCATG<br>Reverse: AGCGGCAGTGACAGACGA    |
| Y55A            | AaOSBS WT       | Forward: GGAACCGACC <u>gcg</u> ACGGAAGAATGTACCG<br>Reverse: GCCAGAGCCACGCATTCC |
| Y299I           | AaOSBS WT       | Forward: CGGTGGCATG <u>atc</u> GAAACCGGTG<br>Reverse: ACCCAAGCTGCCATGCCT       |
| M18F/Y299I      | AaOSBS M18F     | Forward: CGGTGGCATG <u>atc</u> GAAACCGGTG<br>Reverse: ACCCAAGCTGCCATGCCT       |

All DNA primers are shown in the 5' to 3' direction. The underlined bases designate the codons where mutations were introduced.
